# Supplementary material for: Substituent effects on the fluorescent spin-crossover Fe(ii) complexes of rhodamine 6G hydrazones
Source: Royal Society of Chemistry journal article supplement (doi:10.1039/c9qi00111e), 2019-01-01
Supplement: c9qi00111e1.pdf [file c9qi00111e1.pdf]

## Electronic Supplementary information (ESI)

### **Substituent effects on fluorescent spin-crossover Fe(II) complexes of rhodamine 6G hydrazones**

Juan Yuan,<sup>\*a,b</sup> Mei-Jiao Liu,<sup>b</sup> Shu-Qi Wu,<sup>c</sup> Xin Zhu,<sup>a</sup> Nan Zhang,<sup>b</sup> Osamu Sato<sup>\*c</sup> and  
Hui-Zhong Kou<sup>\*b</sup>

<sup>a</sup> School of Pharmacy, Henan University of Chinese Medicine, Zhengzhou 450046, P.  
R. China.

<sup>b</sup> Department of Chemistry, Tsinghua University, Beijing 100084, P. R. China

<sup>c</sup> Institute for Materials Chemistry and Engineering, Kyushu University, 744 Motooka  
Nishi-ku, 819-0395 Fukuoka, Japan.

E-mail: [hnzz\\_yuan@163.com](mailto:hnzz_yuan@163.com), [kouhz@mail.tsinghua.edu.cn](mailto:kouhz@mail.tsinghua.edu.cn), [sato@cm.kyushu-u.ac.jp](mailto:sato@cm.kyushu-u.ac.jp)

**Table S1** Magnetic and structural data for Fe<sup>II</sup>N<sub>4</sub>O<sub>2</sub> complexes of pyridylhydrazones

| Complexes                                                      | spin state | Fe-N <sub>imine</sub> / Å | Fe-N <sub>pyridyl</sub> / Å | Fe-O / Å           | <i>trans</i> -N-Fe-N angle /° | Ref       |
|----------------------------------------------------------------|------------|---------------------------|-----------------------------|--------------------|-------------------------------|-----------|
| Fe(L <sup>1</sup> ) <sub>2</sub>                               | HS         | 2.095(2), 2.103(2)        | 2.264(2), 2.236(2)          | 2.119(1), 2.083(2) | 158.6(7)                      | 28        |
| Fe(L <sup>4</sup> ) <sub>2</sub>                               | HS         | 2.079(3), 2.079(3)        | 2.236(3), 2.204(4)          | 2.086(3), 2.124(3) | 166.7(1)                      | 28        |
| Fe(L <sup>5</sup> ) <sub>2</sub>                               | HS         | 2.024(3) × 2              | 2.083(4) × 2                | 2.068(3) × 2       | 174.6(3)                      | 28        |
| Fe(L <sup>7</sup> ) <sub>2</sub>                               | HS         | 2.072(2) × 2              | 2.149(2) × 2                | 2.082(2) × 2       | 177.1(1)                      | 29        |
| Fe(L <sup>9</sup> ) <sub>2</sub>                               | HS         | 2.101(2) × 2              | 2.221(2) × 2                | 2.079(2) × 2       | 162.48(11)                    | 27        |
| Fe(L <sup>10</sup> ) <sub>2</sub>                              | HS@290 K   | 2.112(4), 2.098(4)        | 2.201(4), 2.206(4)          | 2.089(4), 2.057(4) | 164.72(16)                    | 32        |
| Fe(L <sup>10</sup> ) <sub>2</sub>                              | HS@315 K   | 2.097(5) × 2              | 2.213(5) × 2                | 2.076(4) × 2       | 165.9(3)                      | 32        |
| Fe(L <sup>11</sup> ) <sub>2</sub>                              | HS         | 2.069(4), 2.070(4)        | 2.190(4), 2.205(3)          | 2.075(3), 2.085(3) | 161.29(14)                    | 31        |
| Fe <sub>4</sub> (L <sup>13</sup> ) <sub>4</sub> X <sub>4</sub> | HS Fe1     | 2.101(7), 2.136(7)        | 2.195(7), 2.202(7)          | 2.141(5), 2.121(5) | 168.5(3)                      | 30        |
| Fe <sub>4</sub> (L <sup>13</sup> ) <sub>4</sub> X <sub>4</sub> | HS Fe2     | 2.127(7), 2.105(7)        | 2.168(7), 2.204(7)          | 2.124(6), 2.080(6) | 171.9(3)                      | 30        |
| Fe <sub>4</sub> (L <sup>13</sup> ) <sub>4</sub> X <sub>4</sub> | HS Fe3     | 2.135(7), 2.109(7)        | 2.139(7), 2.175(7)          | 2.082(5), 2.145(5) | 165.8(3)                      | 30        |
| Fe <sub>4</sub> (L <sup>13</sup> ) <sub>4</sub> X <sub>4</sub> | HS Fe4     | 2.136(7), 2.109(7)        | 2.158(8), 2.193(7)          | 2.109(5), 2.117(6) | 166.8(3)                      | 30        |
| Fe <sub>4</sub> (L <sup>13</sup> ) <sub>4</sub> X <sub>4</sub> | HS Fe2     | 2.112(6), 2.066(6)        | 2.126(6), 2.166(6)          | 2.081(5), 2.103(5) | 170.7(2)                      | 30        |
| Fe <sub>4</sub> (L <sup>13</sup> ) <sub>4</sub> X <sub>4</sub> | HS Fe3     | 2.124(6), 2.095(6)        | 2.172(6), 2.199(6)          | 2.104(5), 2.144(5) | 167.3(2)                      | 30        |
| <b>1</b>                                                       | HS@173 K   | 2.104(5), 2.122(5)        | 2.245(5), 2.270(5)          | 2.053(4), 2.069(4) | 166.8(2)                      | This work |
| [Fe(L') <sub>2</sub> ](ClO <sub>4</sub> ) <sub>2</sub>         | HS (93%)   | 2.093(3), 2.101(3)        | 2.219(3), 2.244(3)          | 2.062(2), 2.081(3) | 165.05(13)                    | 19        |
| [Fe(L') <sub>2</sub> ](ClO <sub>4</sub> ) <sub>2</sub>         | LS (75%)   | 1.914(3), 1.914(3)        | 2.059(3), 2.068(3)          | 1.966(2), 1.962(3) | 169.01(12)                    | 19        |
| Fe(L <sup>3</sup> ) <sub>2</sub>                               | LS (85%)   | 1.875(2), 1.884(2)        | 1.966(2), 1.963(2)          | 1.993(2), 1.975(2) | 174.0(1)                      | 28        |
| <b>2</b>                                                       | LS         | 1.852(7), 1.858(7)        | 1.937(6), 1.956(5)          | 1.945(4), 1.936(4) | 174.2(2)                      | This work |
| Fe(L <sup>2</sup> ) <sub>2</sub>                               | LS         | 1.864(8), 1.857(8)        | 1.947(9), 1.915(9)          | 2.003(7), 1.988(8) | 176.5(4)                      | 28        |
| Fe(L <sup>5</sup> ) <sub>2</sub>                               | LS         | 1.870(2) × 2              | 1.946(2) × 2                | 1.995(2) × 2       | 176.0(2)                      | 28        |
| Fe(L <sup>6</sup> ) <sub>2</sub>                               | LS         | 1.864(2), 1.870(2)        | 1.927(2), 1.944(2)          | 1.973(2), 1.985(2) | 179.4(0)                      | 28        |
| Fe(L <sup>7</sup> ) <sub>2</sub>                               | LS         | 1.888(2) × 2              | 1.967(2) × 2                | 1.991(2) × 2       | 172.4(1)                      | 29        |
| Fe(L <sup>8</sup> ) <sub>2</sub>                               | LS         | 1.859(3), 1.876(3)        | 1.964(3), 1.947(2)          | 1.996(2), 1.978(2) | 178.6(1)                      | 29        |
| Fe(L <sup>9</sup> ) <sub>2</sub> ·MeOH                         | LS         | 1.864(2) × 2              | 1.950(2) × 2                | 1.983(1) × 2       | 179.07(10)                    | 27        |
| Fe(L <sup>10</sup> ) <sub>2</sub>                              | LS Fe2     | 1.865(4), 1.856(4)        | 1.935(4), 1.945(4)          | 1.977(4), 1.995(3) | 178.77(19)                    | 32        |
| Fe(L <sup>10</sup> ) <sub>2</sub>                              | LS Fe1     | 1.865(5) × 2              | 1.946(5) × 2                | 1.982(4) × 2       | 177.9(3)                      | 32        |
| Fe(L <sup>10</sup> ) <sub>2</sub>                              | LS         | 1.868(3), 1.868(3)        | 1.941(4), 1.951(3)          | 1.966(3), 1.972(3) | 179.01(18)                    | 32        |
| Fe(L <sup>11</sup> ) <sub>2</sub>                              | LS         | 1.865(2), 1.867(2)        | 1.960(2), 1.955(2)          | 2.014(2), 2.015(2) | 175.06(7)                     | 31        |
| Fe(L <sup>12</sup> ) <sub>2</sub>                              | LS         | 1.833(8) × 2              | 1.963(7) × 2                | 1.972(5) × 2       | 179.1(4)                      | 31        |
| Fe <sub>4</sub> (L <sup>13</sup> ) <sub>4</sub> X <sub>4</sub> | LS Fe1     | 1.962(6), 1.909(8)        | 2.025(6), 2.001(6)          | 2.014(5), 2.049(5) | 170.8(3)                      | 30        |
| Fe <sub>4</sub> (L <sup>13</sup> ) <sub>4</sub> X <sub>4</sub> | LS Fe4     | 1.968(6), 1.950(8)        | 2.020(7), 2.048(6)          | 2.045(5), 2.047(5) | 171.9(3)                      | 30        |

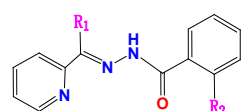

HL<sup>1</sup>: R<sub>1</sub> = H, R<sub>2</sub> = H  
 HL<sup>2</sup>: R<sub>1</sub> = CH<sub>3</sub>, R<sub>2</sub> = H  
 HL<sup>3</sup>: R<sub>1</sub> = ph, R<sub>2</sub> = H  
 HL<sup>4</sup>: R<sub>1</sub> = H, R<sub>2</sub> = OH  
 HL<sup>5</sup>: R<sub>1</sub> = CH<sub>3</sub>, R<sub>2</sub> = OH  
 HL<sup>6</sup>: R<sub>1</sub> = ph, R<sub>2</sub> = OH

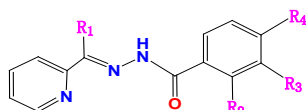

HL<sup>7</sup>: R<sub>1</sub> = (CH<sub>2</sub>)<sub>2</sub>CH<sub>3</sub>, R<sub>2</sub> = OH, R<sub>3</sub> = CH<sub>3</sub>  
 HL<sup>8</sup>: R<sub>1</sub> = (CH<sub>2</sub>)<sub>2</sub>CH<sub>3</sub>, R<sub>2</sub> = OH, R<sub>3</sub> = H  
 HL<sup>9</sup>: R<sub>1</sub> = H, R<sub>2</sub> = H, R<sub>3</sub> = H, R<sub>4</sub> = OH  
 HL<sup>10</sup>: R<sub>1</sub> = H, R<sub>2</sub> = H, R<sub>3</sub> = H, R<sub>4</sub> = (CH<sub>2</sub>)<sub>3</sub>CH<sub>3</sub>

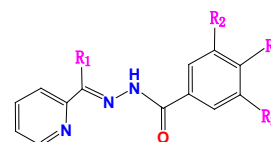

HL<sup>11</sup>: R<sub>1</sub> = C<sub>3</sub>H<sub>7</sub>, R<sub>2</sub> = CH<sub>3</sub>  
 HL<sup>12</sup>: R<sub>1</sub> = CH<sub>3</sub>, R<sub>2</sub> = C<sub>4</sub>H<sub>9</sub>

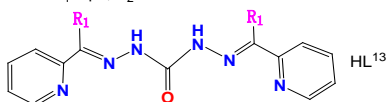

**Table S2** Fe-L bond lengths of optimized geometries.

|                      | [Fe(L <sup>1</sup> <sub>s</sub> (Br)) <sub>2</sub> ] | [Fe(L' <sub>s</sub> (Me)) <sub>2</sub> ] | [Fe(L'(Me)) <sub>2</sub> ] <sup>2+</sup> | [Fe(L <sup>2</sup> <sub>s</sub> (H)) <sub>2</sub> ] |
|----------------------|------------------------------------------------------|------------------------------------------|------------------------------------------|-----------------------------------------------------|
| Fe-N <sub>py</sub>   | 2.071 Å, 2.071 Å                                     | 2.045 Å, 2.050 Å                         | 2.075 Å, 2.076 Å                         | 1.978 Å, 1.978 Å                                    |
| Fe-N <sub>imi</sub>  | 1.886 Å, 1.881 Å                                     | 1.880 Å, 1.884 Å                         | 1.894 Å, 1.893 Å                         | 1.881 Å, 1.881 Å                                    |
| Fe-O <sub>enol</sub> | 1.983 Å, 1.983 Å                                     | 1.973 Å, 1.972 Å                         | 2.003 Å, 2.003 Å                         | 1.963 Å, 1.963 Å                                    |

**Table S3** 3d-Centered orbital energies and crystal field splitting energies (in atomic unit, a.u.) in optimized geometries.

|                             | [Fe(L <sup>1</sup> <sub>s</sub> ) <sub>2</sub> ] | [Fe(L' <sub>s</sub> ) <sub>2</sub> ] | [Fe(L') <sub>2</sub> ] <sup>2+</sup> <sup>a</sup> | [Fe(L <sup>2</sup> <sub>s</sub> ) <sub>2</sub> ] |
|-----------------------------|--------------------------------------------------|--------------------------------------|---------------------------------------------------|--------------------------------------------------|
| e <sub>2g</sub> (2)         | -0.0064                                          | -0.0055                              | -0.1470                                           | -0.0040                                          |
| e <sub>2g</sub> (1)         | -0.0414                                          | -0.0243                              | -0.1679                                           | -0.0212                                          |
| t <sub>2g</sub> (3)         | -0.1684                                          | -0.1622                              | -0.3019                                           | -0.1647                                          |
| t <sub>2g</sub> (2)         | -0.1827                                          | -0.1759                              | -0.3141                                           | -0.1773                                          |
| t <sub>2g</sub> (1)         | -0.1884                                          | -0.1804                              | -0.3180                                           | -0.1809                                          |
| Δ <sub>o</sub> <sup>b</sup> | 0.1578                                           | 0.1579                               | 0.1593                                            | 0.1617                                           |

<sup>a</sup> Not simplified molecule. <sup>b</sup> Δ<sub>o</sub> = E<sub>av</sub>(e<sub>g</sub>) - E<sub>av</sub>(t<sub>2g</sub>).

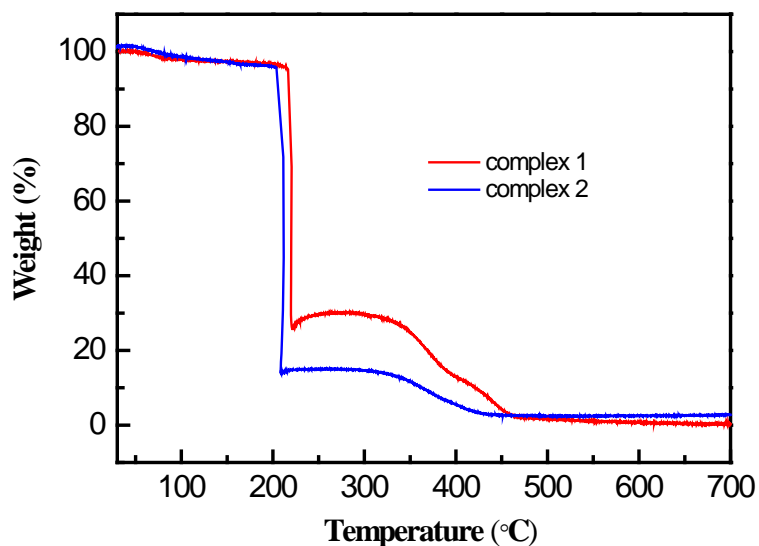**Fig. S1** TGA curve of complexes 1 and 2.

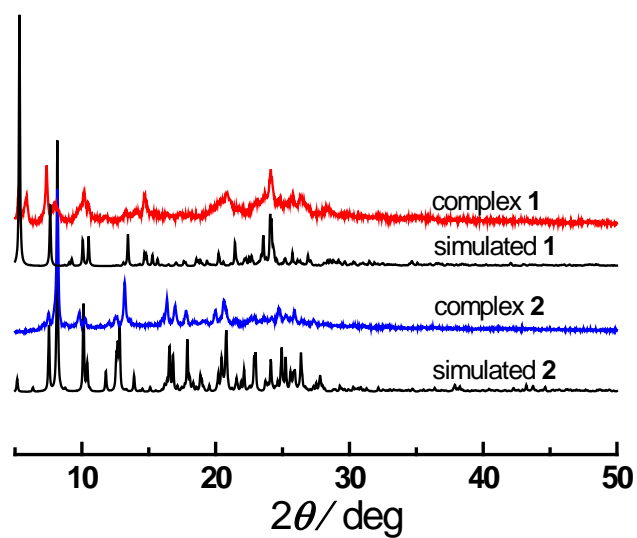

**Fig. S2** XRD patterns at room temperature for complexes **1** and **2**.

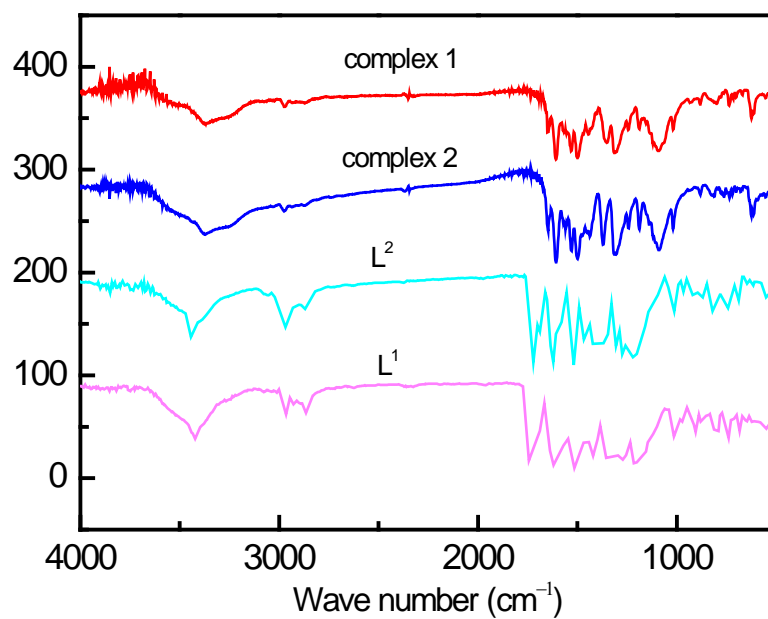

**Fig. S3** IR spectra for  $L^1$ ,  $L^2$  and complexes **1-2**.

[Fe(L<sup>1</sup><sub>s</sub>)<sub>2</sub>] for complex **1**

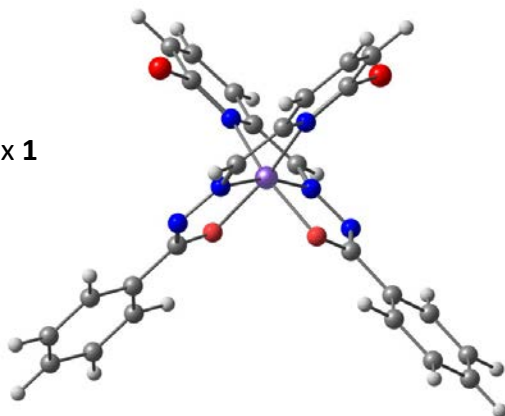

[Fe(L<sup>2</sup><sub>s</sub>)<sub>2</sub>] for complex **2**

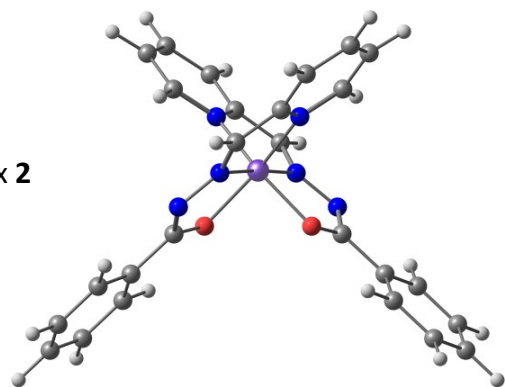

[Fe(L'<sub>s</sub>)<sub>2</sub>] for [Fe(L')<sub>2</sub>](ClO<sub>4</sub>)<sub>2</sub>

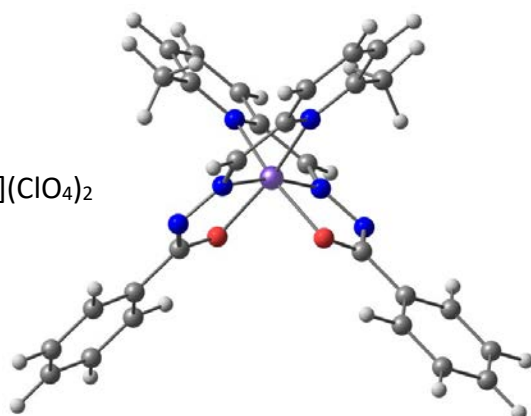

**Fig. S4** Optimized model structures for complexes **1**, **2** and [Fe(L')<sub>2</sub>](ClO<sub>4</sub>)<sub>2</sub>.

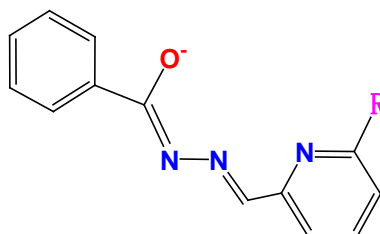

**Fig. S5** Simplified structures for the ligands in complexes **1** (R = Br), **2** (R = H) and [Fe(L')<sub>2</sub>](ClO<sub>4</sub>)<sub>2</sub> (R = CH<sub>3</sub>).

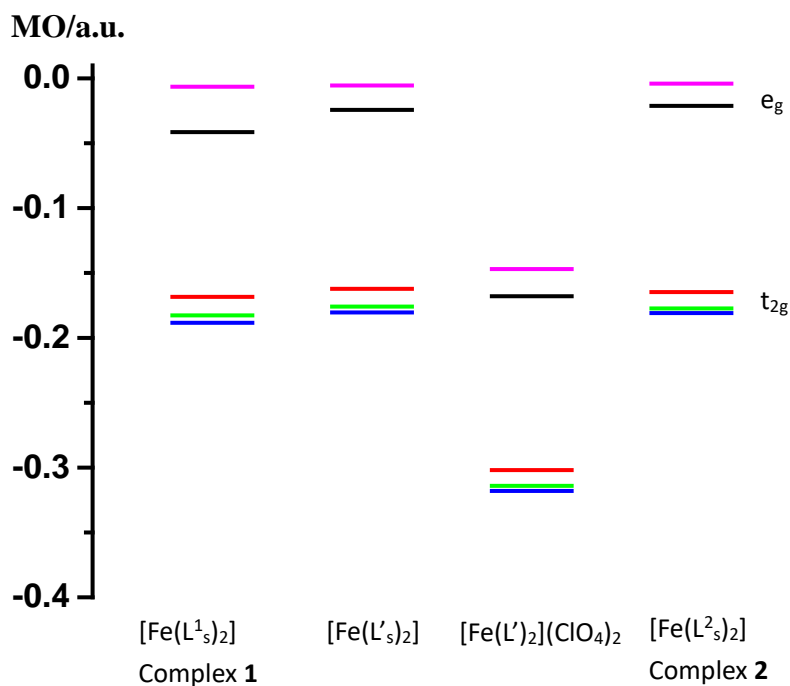

**Fig. S6** Energy level in the atomic unit (a.u.) for 3d orbitals of Fe(II) in simplified model complexes **1** (R = Br), [Fe(L<sup>1</sup>)<sub>2</sub>] (R = Me) and **2** (R = H) as well as [Fe(L<sup>1</sup>)<sub>2</sub>](ClO<sub>4</sub>)<sub>2</sub> based on the data in Table S3.

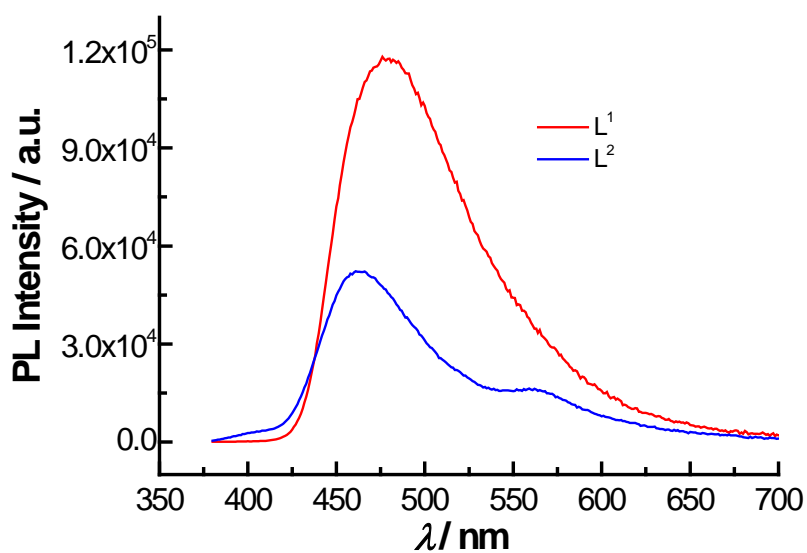

**Fig. S7** The emission spectra for ligands L<sup>1</sup> and L<sup>2</sup> in solid state ( $\lambda_{\text{ex}} = 355 \text{ nm}$ ) at room temperature.
